# Supplementary material for: Robotic hernia repair III. English version: Robotic incisional hernia repair with transversus abdominis release (r‑TAR). Video report and results of a cohort study
Source: PubMed Central journal article supplement (PMC8695562; doi:10.1007/s00104-021-01500-y), 2021-09-08
Supplement: 104_2021_1500_MOESM2_ESM.pdf [file 104_2021_1500_MOESM2_ESM.pdf]

Patient-ID

Date: \_\_\_\_ / \_\_\_\_ / \_\_\_\_

Surgeon: \_\_\_\_\_

**r-TAR  
(rh-TAR)**

Supien position  
Arm positioning not relevant

Intraoperative  
Re-dock

**Manual targeting**

daVinci Anatomy:  
• (none)

daVinci Position:  
• (none)

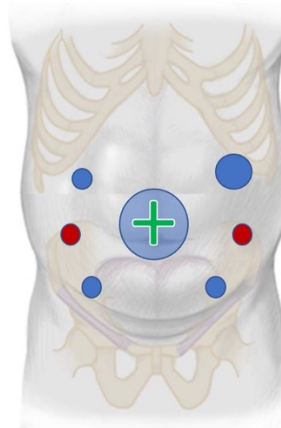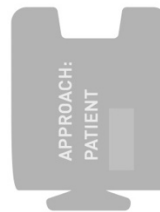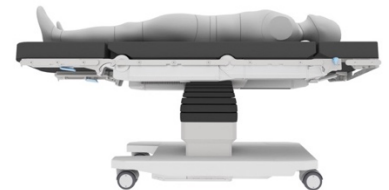

**Perioperative Procedures/daVinci Checklist** (Note: Does not replace the WHO Team Time-Out).

I have reviewed the patient informed consent sheet and checked it for content and comments:  Yes  No

Perioperative antibiotics:  Yes  Cefuroxim 1,5g to 3g (Alternative:  Clindamycin 600mg)

Hybrid-Procedure:  Yes  No If yes, inform nurse to prepare additional instruments.

**Before docking: Prepare for double docking.**

Distance of trocar line to the hernia gap is approximately 15cm:  Yes  No

It is a recurrent hernia:  Yes  No

Number of previous repairs and history of adhesiolysis known:  Yes  No

Ropivacaine infiltration of port incisions:  Yes  No

Laparoscopic visual inspection of port placement  Yes  No

**Console:**

Start through left-sided trocars:  Yes  No

Complete adhesiolysis of the abdominal wall needed:  Yes  No

Entry to the contralateral rectus sheath at the hernia gap border:  Yes  No

**Transversus abdominis release, top-down (yellow arrow) or down-to-up (green arrow)**

Preparation at costal margin, diaphragm and xiphoid, complete cranial transection of the posterior rectus sheath:  Yes  No

Preparation in the spaces of Retzius and Bogros:  Yes  No

Re-dock, analogous preparation from the right, extraperitonealisation of ports  Yes  No

Check for peritoneal tears/lesions (suture if necessary):  Yes  No

Median running suture of posterior rectus sheath (V-Loc 0):  Yes  No

Median running suture of anterior rectus sheath (including hernia sac)(V-Loc 0):  Yes  No

Measuring of mesh size, roll the mesh for insertion and positioning:  Yes  No

**Revision of hemostasis and application of Arista:**  Yes  No

**Reduction of pneumoperitoneum to 4mmHg for 3min or RR>160mmHg**  Yes  No

Positioning of 2 silicone drains (retroxiophoidal and suprapubic):  Yes  No

**Ending:**

**Hybrid skin resection:**  Yes  No

OR-data recorded in the hernia registry:  Yes  No

Laparoscopic visual inspection of port removal:  Yes  No

**Pre-stationary preparation:**

CT abdomen with transverse and sagittal sections (morphology and probability of adhesions)  
Dietz incisional hernia classification (2007)

**Sutures and materials:**

V-Loc 180 (green) 0 USP V-21 (30cm)  
Vicryl 3-0 SH (20cm)  
Vicryl 3-0 (Sutupak) for mesh rolling up  
Ruler  
Versatex mesh 30x30cm  
Marking pen  
2 silicone drains #18  
Arista AH  
Arista FlexTip XL-R Applicator

**Positioning of the patient on OR-table**

Supine position  
No pink pad needed  
Both arms extended

**Planned OP time:** 4-6h

**CIRS record:**  Yes  No

**Instruments:**

30° optics  
Prograsp Forceps  
Mega SutureCut Needle Driver  
Hot Shears MCS  
5x 8mm daVinci Port  
1x 12mm daVinci Port

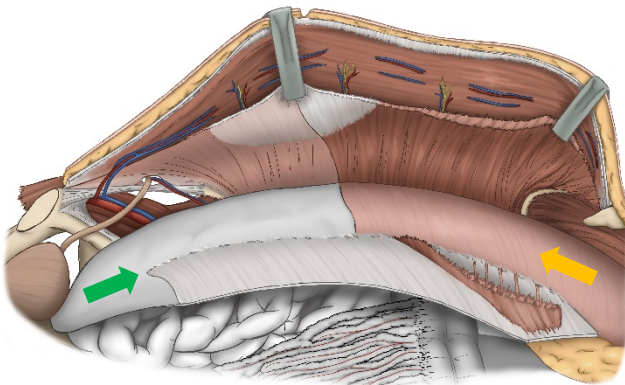

Dietz (Hrsg.) (2021) Offene Hernienchirurgie. Springer Verlag.

**Skin closure:**

Ropivacaine 0,5% 10ml  
Caprosyn 4-0 USP with P-24 needle  
Cyanoacrylate-Glue

**Postoperative prescription:**

**PONV-prophylaxis**  
Mobilisation on the same evening  
Small dinner  
Thromboembolism prophylaxis  
Keep drains for 2-3 days

**Swiss-DRG** G09D, Target dwell time: **0** | 3 | 9 days

Planned discharge: \_\_\_\_/\_\_\_\_/\_\_\_\_

Dietz et al (2007) J Plast Reconstr Aesthet Surg 60: 383-388.

| Ocurrence                    | M = morphology                                                                                                                     | S = size (cm) | RF = risk factors (+ → +++)                                                                                                                                                             |
|------------------------------|------------------------------------------------------------------------------------------------------------------------------------|---------------|-----------------------------------------------------------------------------------------------------------------------------------------------------------------------------------------|
| p (primary)<br>r (recurrent) | m (median)<br>u (umbilical)<br>sp (suprapubic)<br>sc (subcostal)<br>t (transversal)<br>l (lumbal)<br>pm (paramedian)<br>nc (other) | a x b         | Obesity (BMI >25)<br>Male gender<br>Nicotine abuse<br>Wound contamination<br>Age > 45 years<br>Disease<br>2nd laparot. < 1 month<br>Emergency procedure<br>Postop. Complications<br>... |

v/i M... S...x... RF...

**Debriefing: What can be done better in the next surgery?**
